# Supplementary material
Source: MDPI journal article supplement (https://www.mdpi.com/2673-1924/2/3/29)
Supplement: s1 [file s1]

## Supplementary Table 1

Benthic percentage categories of surveyed coral reef sites in Jaffna Peninsula, Sri Lanka

|                    | Knr |    | Kt1 |    | Kt2 |    | Dlt |    | Val |    | Inb |    | Ptm |    | Tho |    | Pu1 |    | Pu2 |    |
|--------------------|-----|----|-----|----|-----|----|-----|----|-----|----|-----|----|-----|----|-----|----|-----|----|-----|----|
| Substrate category | MP  | SE |
| HC                 | 22  | 8  | 29  | 4  | 18  | 5  | 16  | 5  | 42  | 5  | 44  | 3  | 52  | 7  | 46  | 6  | 42  | 3  | 29  | 2  |
| SC                 | 3   | 3  | 0   | 0  | 0   | 0  | 3   | 2  | 3   | 2  | 3   | 2  | 4   | 3  | 2   | 1  | 0   | 0  | 0   | 0  |
| RKC                | 0   | 0  | 0   | 0  | 0   | 0  | 0   | 0  | 0   | 0  | 0   | 0  | 0   | 0  | 0   | 0  | 0   | 0  | 0   | 0  |
| NIA                | 29  | 10 | 0   | 0  | 0   | 0  | 6   | 4  | 24  | 3  | 6   | 3  | 7   | 4  | 6   | 4  | 2   | 1  | 16  | 4  |
| SP                 | 8   | 2  | 1   | 1  | 2   | 1  | 3   | 1  | 0   | 0  | 4   | 2  | 3   | 1  | 0   | 0  | 1   | 1  | 2   | 1  |
| RC                 | 23  | 8  | 40  | 5  | 57  | 8  | 40  | 2  | 20  | 1  | 24  | 4  | 24  | 5  | 31  | 6  | 19  | 3  | 22  | 3  |
| RB                 | 3   | 3  | 11  | 6  | 9   | 2  | 0   | 0  | 0   | 0  | 6   | 3  | 8   | 4  | 7   | 3  | 34  | 5  | 29  | 2  |
| SD                 | 5   | 3  | 0   | 0  | 1   | 1  | 31  | 5  | 11  | 4  | 0   | 0  | 0   | 0  | 1   | 1  | 3   | 1  | 2   | 1  |
| SI                 | 9   | 7  | 19  | 5  | 14  | 10 | 0   | 0  | 0   | 0  | 13  | 4  | 1   | 1  | 8   | 5  | 0   | 0  | 0   | 0  |
| OT                 | 0   | 0  | 0   | 0  | 0   | 0  | 1   | 1  | 0   | 0  | 0   | 0  | 1   | 1  | 0   | 0  | 0   | 0  | 0   | 0  |

MP- Mean percentage cover of benthic categories, SE- Standard error of mean percentage cover categories

Ptm- Point Pedro “Munai”, Inb- Inbarsitty, Tho- Thondaimanaru, Val- Valithoondal, Knr- Karainagar, Pu1&Pu2- Pungudutivu, Kt1&Kt2- Kayts, Pu1 &Pu2- Pungudutivu.

HC: hard coral, SC: soft coral, RKC: recently killed coral, NIA: nutrient indicator algae, SP: sponge, RC: rocks covered with turf or coralline algae, RB: broken coral rubble, SD: s&, SI: silt, & OT: others

Supplementary Table 2: Diversity and distribution of scleractinian corals on the reefs of Jaffna Peninsula and its' four islands

| Sp no. | Family                       | Genus                                 | Species                                  | Ptm | Inb | Tho | Val | Knr | Pu1& Pu2 | Kt1& Kt2 | Dlt |
|--------|------------------------------|---------------------------------------|------------------------------------------|-----|-----|-----|-----|-----|----------|----------|-----|
| 1      | Acroporidae<br>Verrill, 1901 | <i>Acropora</i> Oken, 1815            | <i>A. aspera</i> Dana, 1846              | X   | X   |     |     |     | X        | X        |     |
| 2      |                              |                                       | <i>A. cytherea</i> Dana, 1846            |     |     |     |     |     | X        |          |     |
| 3      |                              |                                       | <i>A. digitifera</i> Dana, 1846          |     |     |     | X   |     |          |          | X   |
| 4      |                              |                                       | <i>A. divaricata</i> Dana, 1846          |     |     | X   |     |     |          |          |     |
| 5      |                              |                                       | <i>A. formosa</i> Dana, 1846             | X   | X   |     |     |     | X        | X        |     |
| 6      |                              |                                       | <i>A. gemmifera</i> Brook, 1892          | X   | X   | X   | X   | X   |          | X        | X   |
| 7      |                              |                                       | <i>A. hemprichii</i> Ehrenberg, 1834     |     |     |     |     | X   |          |          |     |
| 8      |                              |                                       | <i>A. humilis</i> Dana, 1846             |     |     |     |     |     | X        | X        |     |
| 9      |                              |                                       | <i>A. hyacinthus</i> Dana, 1846          | X   |     | X   |     | X   | X        | X        |     |
| 10     |                              |                                       | <i>A. lamarcki</i> Veron, 2000           |     |     |     |     |     |          | X        |     |
| 11     |                              |                                       | <i>A. latistella</i> Brook, 1891         |     |     |     |     | X   |          |          |     |
| 12     |                              |                                       | <i>A. millepora</i> Ehernberg, 1834      | X   | X   | X   | X   | X   |          | X        | X   |
| 13     |                              |                                       | <i>A. pinguis</i> Wells, 1950            |     |     | X   |     |     |          |          |     |
| 14     |                              |                                       | <i>A. pulchra</i> Brook, 1891            |     |     |     |     |     | X        |          |     |
| 15     |                              |                                       | <i>A. samoensis</i> Brook, 1891          |     |     |     |     |     | X        |          |     |
| 16     |                              |                                       | <i>A. scherzeriana</i> Bruggemann, 1877  |     |     | X   |     |     |          |          |     |
| 17     |                              |                                       | <i>A. tenuis</i> Dana, 1846              |     |     |     |     |     | X        |          |     |
| 18     |                              | <i>Alveopora</i><br>Blainville, 1830  | <i>A. allingi</i> Hoffmeister, 1925      | X   |     | X   | X   |     |          |          | X   |
| 19     |                              |                                       | <i>A. fenestrata</i> Lamarck, 1816       |     |     |     |     |     |          | X        | X   |
| 20     |                              | <i>Astreopora</i><br>Blainville, 1830 | <i>A. myriophthalma</i> Lamarck, 1816    | X   | X   | X   |     |     |          | X        |     |
| 21     |                              |                                       | <i>A. listeri</i> Bernard, 1896          |     | X   |     |     |     |          |          |     |
| 22     |                              |                                       | <i>A. ocellata</i> Bernard, 1896         |     | X   |     |     |     |          |          |     |
| 23     |                              | <i>Montipora</i><br>Blainville, 1830  | <i>M. foliosa</i> Pallas, 1766           | X   |     | X   |     |     |          | X        |     |
| 24     |                              |                                       | <i>M. monasteriata</i> Forskal, 1775     |     | X   |     |     |     |          |          |     |
| 25     |                              |                                       | <i>M. aequituberculata</i> Bernard, 1897 |     | X   |     |     |     |          |          |     |

| Sp no. | Family                                     | Genus                                          | Species                               | Ptm | Inb | Tho | Val | Knr | Pu1& Pu2 | Kt1& Kt2 | Dlt |
|--------|--------------------------------------------|------------------------------------------------|---------------------------------------|-----|-----|-----|-----|-----|----------|----------|-----|
| 26     |                                            |                                                | <i>M. flabellata</i> Studer, 1901     | X   |     |     |     |     |          |          |     |
| 27     |                                            |                                                | <i>M. informis</i> Bernard, 1897      | X   | X   | X   |     |     |          | X        | X   |
| 28     |                                            |                                                | <i>M. undata</i> Bernard, 1897        | X   |     |     |     |     |          |          |     |
| 29     | Agariciidae Gray, 1847                     | <i>Pavona</i> Lamarck, 1801                    | <i>P. clavus</i> Dana, 1846           |     |     |     |     |     |          | X        |     |
| 30     |                                            |                                                | <i>P. venosa</i> Ehrenberg, 1834      |     |     |     |     |     | X        |          |     |
| 31     |                                            | <i>Coeloseris</i> Vaughan, 1918                | <i>C. mayeri</i> Vaughan, 1918        |     |     |     |     | X   |          |          |     |
| 32     | Dendrophylliidae Gray, 1847                | <i>Turbinaria</i> Oken, 1815                   | <i>T. frondens</i> Dana, 1846         |     |     | X   |     |     |          |          |     |
| 33     |                                            |                                                | <i>T. mesenterina</i> Lamarck, 1816   | X   |     |     |     |     |          |          |     |
| 34     |                                            |                                                | <i>T. peltata</i> Esper, 1794         | X   |     |     |     | X   |          |          | X   |
| 35     |                                            |                                                | <i>T. reniformis</i> Bernard, 1896    |     |     | X   |     | X   |          |          | X   |
| 36     |                                            |                                                | <i>T. stelluta</i> Lamarck, 1816      |     |     | X   |     |     |          | X        |     |
| 37     | Diploastraeidae Chevalier & Beauvais, 1987 | <i>Diploastrea</i> Matthai. 1914               | <i>D. heliopora</i> Lamarck, 1816     |     |     | X   |     |     |          |          |     |
| 38     | Euphylliidae Alloiteau, 1952               | <i>Galaxea</i> Oken, 1815                      | <i>G. astreata</i> Lamarck, 1816      |     |     |     |     | X   |          |          |     |
| 39     |                                            |                                                | <i>G. fascicularis</i> Linnaeus, 1767 | X   |     | X   | X   |     | X        |          |     |
| 40     | Fungiidae Dana, 1846                       | <i>Podabacia</i> Milne Edwards & Haime, 1849   | <i>P. crustacea</i> Pallas, 1766      |     |     |     |     |     |          | X        |     |
| 41     |                                            |                                                | <i>P. lankaensis</i> Veron, 2000      |     |     |     |     |     |          | X        |     |
| 42     |                                            | <i>S&amp;alolitha</i> Quelch, 1884             | <i>S. robusta</i> Quelch, 1866        |     |     | X   |     |     |          |          |     |
| 43     | Plesiastreidae Dai & Horng, 2009           | <i>Plesiastrea</i> Milne Edwards & Haime, 1848 | <i>P. versipora</i> Lamarck, 1816     | X   |     | X   |     |     |          |          | X   |
| 44     | Oulastreidae Vaughan, 1919                 | <i>Oulastrea</i> Milne Edwards & Haime, 1848   | <i>O. crispata</i> Lamarck, 1816      |     |     |     |     | X   |          |          |     |

| Sp no. | Family                      | Genus                                         | Species                                                   | Ptm | Inb | Tho | Val | Knr | Pu1& Pu2 | Kt1& Kt2 | Dlt |
|--------|-----------------------------|-----------------------------------------------|-----------------------------------------------------------|-----|-----|-----|-----|-----|----------|----------|-----|
| 45     | Leptastreidae Rowlett, 2020 | <i>Leptastrea</i> Milne Edwards & Haime, 1849 | <i>L. purpurea</i> Dana, 1846                             |     |     |     | X   | X   |          | X        |     |
| 46     |                             |                                               | <i>L. transversa</i> Klunzinger, 1879                     | X   | X   |     |     | X   |          | X        |     |
| 47     | Scleractinia incertae sedis | <i>Pachyseris</i> Milne Edwards & Haime, 1849 | <b><i>P. gemmae</i> Nemenzo, 1955</b>                     |     |     | X   |     |     |          |          |     |
| 48     | Merulinidae Verrill, 1865   | <i>Astrea</i> Lamarck, 1801                   | <i>A. curta</i> Dana, 1846                                | X   | X   | X   |     | X   | X        | X        | X   |
| 49     |                             | <i>Coelastrea</i> Verrill, 1866               | <i>C. aspera</i> Verrill, 1865                            | X   |     |     |     |     |          | X        | X   |
| 50     |                             |                                               | <b><i>C. palauensis</i> Yabe &amp; Sugiyama, 1936</b>     |     |     |     |     | X   |          |          | X   |
| 51     |                             | <i>Cyphastrea</i> Milne Edwards & Haime, 1848 | <i>C. chalcidicum</i> Forskal, 1775                       |     |     |     | X   |     |          |          | X   |
| 52     |                             |                                               | <b><i>C. japonica</i> Yabe &amp; Sugiyama, 1936</b>       |     |     |     |     |     |          |          | X   |
| 53     |                             |                                               | <b><i>C. microphthalma</i> Lamarck, 1816</b>              |     |     |     |     |     | X        | X        | X   |
| 54     |                             |                                               | <i>C. serailia</i> Forskal, 1775                          |     |     |     |     |     |          | X        |     |
| 55     |                             | <i>Dipsastraea</i> Blainville, 1830           | <b><i>D. amicorum</i> Milne Edwards &amp; Haime, 1850</b> |     |     |     |     |     |          |          | X   |
| 56     |                             |                                               | <i>D. favus</i> Forskal, 1775                             | X   | X   | X   | X   | X   | X        | X        | X   |
| 57     |                             |                                               | <b><i>D. lizardensis</i> Veron &amp; Pichon, 1977</b>     | X   |     |     | X   | X   | X        | X        | X   |
| 58     |                             |                                               | <i>D. matthai</i> Vaughan, 1918                           |     |     |     |     |     |          |          | X   |
| 59     |                             |                                               | <i>D. maxima</i> Veron & Pichon, 1977                     |     |     |     |     |     | X        |          | X   |
| 60     |                             |                                               | <i>D. pallida</i> Dana, 1846                              |     |     | X   |     |     |          |          | X   |
| 61     |                             |                                               | <b><i>D. rotumana</i> Gardiner, 1899</b>                  |     |     |     |     |     | X        |          | X   |
| 62     |                             |                                               | <i>D. rotundata</i> Veron & Pichon, 1977                  | X   |     |     |     | X   |          |          |     |
| 63     |                             |                                               | <i>D. speciosa</i> Dana, 1846                             | X   | X   |     |     |     |          |          |     |
| 64     |                             |                                               | <i>D. veroni</i> Moll & Borel Best, 1984                  |     |     | X   |     | X   |          |          | X   |

| Sp no. | Family | Genus                                          | Species                                             | Ptm | Inb | Tho | Val | Knr | Pu1& Pu2 | Kt1& Kt2 | Dlt |
|--------|--------|------------------------------------------------|-----------------------------------------------------|-----|-----|-----|-----|-----|----------|----------|-----|
| 65     |        | <i>Echinopora</i> Lamarck, 1816                | <i>E. gemmacea</i> Lamarck, 1816                    | X   |     | X   |     |     |          |          |     |
| 66     |        |                                                | <i>E. hirsutissima</i> Milne Edwards & Haime, 1849  | X   |     |     |     |     |          |          |     |
| 67     |        |                                                | <i>E. lamellosa</i> Esper, 1795                     | X   |     |     |     |     | X        | X        |     |
| 68     |        | <i>Favites</i> Link, 1807                      | <i>F. abdita</i> Ellis & Solander, 1786             | X   | X   | X   | X   | X   | X        |          |     |
| 69     |        |                                                | <i>F. complanata</i> Ehrenberg, 1834                | X   |     | X   | X   | X   | X        |          |     |
| 70     |        |                                                | <i>F. halicora</i> Ehrenberg, 1834                  |     |     |     |     | X   | X        | X        |     |
| 71     |        |                                                | <i>F. pentagona</i> Esper, 1794                     | X   | X   |     |     |     |          |          |     |
| 72     |        |                                                | <i>F. spinosa</i> Klunzinger, 1879                  | X   | X   |     |     | X   |          |          |     |
| 73     |        |                                                | <i>F. valenciennesi</i> Milne Edwards & Haime, 1848 | X   | X   | X   |     | X   | X        | X        | X   |
| 74     |        | <i>Goniastrea</i> Milne Edwards & Haime, 1848  | <i>G. edwardsi</i> Chevalier, 1971                  |     |     | X   | X   | X   | X        |          |     |
| 75     |        |                                                | <i>G. minuta</i> Veron, 2000                        |     |     |     |     | X   | X        |          |     |
| 76     |        |                                                | <i>G. pectinata</i> Ehrenberg, 1834                 | X   |     |     |     |     |          | X        | X   |
| 77     |        |                                                | <i>G. retiformis</i> Lamarck, 1816                  | X   |     | X   | X   | X   | X        | X        |     |
| 78     |        | <i>Hydnophora</i> Fischer von Waldheim, 1807   | <i>H. microconos</i> Lamarck, 1816                  | X   |     | X   | X   |     |          |          | X   |
| 79     |        | <i>Merulina</i> Ehrenberg, 1834                | <i>M. ampilata</i> Ellis & Solander, 1786           | X   |     |     |     |     |          | X        |     |
| 80     |        | <i>Leptoria</i> Milne Edwards & Haime, 1848    | <i>L. phrygia</i> Ellis & Solander, 1786            | X   | X   | X   | X   | X   |          |          |     |
| 81     |        | <i>Oulophyllia</i> Milne Edwards & Haime, 1848 | <i>O. crispa</i> Lamarck, 1816                      |     | X   | X   | X   | X   | X        | X        |     |
| 82     |        | <i>Platygyra</i> Ehrenberg, 1834               | <i>P. acuta</i> Veron, 2000                         |     | X   | X   |     |     |          |          |     |
| 83     |        |                                                | <i>P. daedalea</i> Ellis & Solander, 1786           | X   |     | X   |     |     |          |          |     |
| 84     |        |                                                | <i>P. lamellina</i> Ehrenberg, 1834                 |     |     | X   |     |     |          |          |     |
| 85     |        |                                                | <i>P. pini</i> Chevalier, 1975                      |     |     |     |     |     |          |          | X   |

| Sp no. | Family                           | Genus                                           | Species                                        | Ptm | Inb | Tho | Val | Knr | Pu1& Pu2 | Kt1& Kt2 | Dlt |
|--------|----------------------------------|-------------------------------------------------|------------------------------------------------|-----|-----|-----|-----|-----|----------|----------|-----|
| 86     |                                  |                                                 | <i>P. sinensis</i> Milne Edwards & Haime, 1849 | X   |     | X   | X   | X   |          |          | X   |
| 87     | Lobophylliidae Dai & Horng, 2009 | <i>Acanthastrea</i> Milne Edwards & Haime, 1848 | <i>A. echinata</i> Dana, 1846                  |     | X   |     | X   |     |          |          |     |
| 88     |                                  |                                                 | <b><i>A. ishigakiensis</i> Veron, 1990</b>     |     |     | X   |     |     |          |          |     |
| 89     |                                  | <i>Echinophyllia</i> Klunzinger, 1879           | <i>E. aspera</i> Ellis & Solander, 1786        | X   |     | X   |     |     |          |          |     |
| 90     |                                  | <i>Lobophyllia</i> de Blainville, 1830          | <i>L. hemprichii</i> Ehrenberg, 1834           |     | X   |     |     | X   |          |          |     |
| 91     |                                  | <i>Micromussa</i> Veron, 2000                   | <b><i>M. amakusensi</i> Veron, 1990</b>        |     |     |     | X   |     |          |          |     |
| 92     |                                  | <i>Symphyllia</i> Milne Edwards & Haime, 1848   | <i>S. agaricia</i> Milne Edwards & Haime, 1849 | X   | X   | X   |     |     |          |          |     |
| 93     |                                  |                                                 | <i>S. radians</i> Milne Edwards & Haime, 1849  | X   | X   | X   | X   |     |          |          | X   |
| 94     |                                  |                                                 | <i>S. recta</i> Dana, 1846                     | X   | X   |     | X   |     |          |          | X   |
| 95     | Pocilloporidae Gray, 1842        | <i>Pocillopora</i> Lamarck, 1816                | <i>P. damicornis</i> Linnaeus, 1758            |     | X   | X   |     |     |          |          |     |
| 96     |                                  |                                                 | <i>P. verucosa</i> Ellis & Solander, 1786      | X   |     |     |     |     |          |          |     |
| 97     |                                  | <i>Stylophora</i> Schweigger, 1820              | <i>S. pistillata</i> Esper, 1797               |     |     |     |     |     |          |          | X   |
| 98     | Poritidae Gray, 1842             | <i>Porites</i> Link, 1807                       | <i>P. annae</i> Crossl&, 1952                  | X   |     |     |     |     |          |          |     |
| 99     |                                  |                                                 | <b><i>P. evermanni</i> Vaughan, 1907</b>       | X   |     |     |     |     |          |          |     |
| 100    |                                  |                                                 | <i>P. lobata</i> Dana, 1846                    | X   | X   | X   |     | X   | X        | X        | X   |
| 101    |                                  |                                                 | <i>P. lutea</i> Milne Edwards & Haime, 1851    | X   |     |     |     |     |          |          |     |
| 102    |                                  |                                                 | <b><i>P. murrayensis</i> Vaughan, 1918</b>     | X   | X   | X   | X   | X   | X        | X        | X   |
| 103    |                                  |                                                 | <b><i>P. pukoensis</i> Vaughan, 1907</b>       |     |     |     |     |     | X        |          |     |
| 104    |                                  |                                                 | <i>P. solida</i> Forskal, 1775                 | X   |     | X   | X   | X   | X        | X        | X   |
| 105    |                                  | <i>Goniopora</i> de Blainville, 1830            | <b><i>G. lobata</i> Milne Edwards, 1860</b>    |     |     | X   | X   | X   |          |          |     |

| Sp no.            | Family                                      | Genus                                             | Species                                          | Ptm | Inb | Tho | Val | Knr | Pu1& Pu2 | Kt1& Kt2 | Dlt |
|-------------------|---------------------------------------------|---------------------------------------------------|--------------------------------------------------|-----|-----|-----|-----|-----|----------|----------|-----|
| 106               |                                             |                                                   | <i>G. minor</i> Crossl &, 1952                   | X   | X   |     |     | X   |          |          | X   |
| 107               |                                             |                                                   | <i>G. somaliensis</i> Vaughan, 1907              |     |     |     |     |     |          |          | X   |
| 108               |                                             |                                                   | <i>G. stokesi</i> Milne Edwards & Haime, 1851    |     | X   |     | X   |     |          |          |     |
| 109               |                                             |                                                   | <i>G. tenuidens</i> Quelch, 1886                 |     |     |     |     |     | X        |          |     |
| 110               |                                             |                                                   | <i>G. paliformis</i> Veron, 2000                 |     |     |     |     |     | X        |          |     |
| 111               | Psammocoridae<br>Chevalier & Beauvais, 1987 | <i>Psammocora</i><br>Dana, 1846                   | <i>P. contigua</i> Esper, 1797                   | X   |     |     |     |     |          |          |     |
| 112               | Siderastreidae<br>Vaughan & Wells, 1943     | <i>Pseudosiderastrea</i><br>Yabe & Sugiyama, 1935 | <i>P. tayami</i> Yabe & Sgiyama, 1935            |     |     |     |     |     |          |          | X   |
| 113               |                                             | <i>Siderastrea</i><br>Blainville, 1830            | <i>S. savignyana</i> Milne Edwards & Haime, 1850 |     |     |     | X   |     | X        |          |     |
| <i>softcorals</i> |                                             |                                                   |                                                  |     |     |     |     |     |          |          |     |
| 1                 | Alcyoniidae                                 | <i>Sinularia</i>                                  |                                                  |     | X   | X   | X   |     |          |          | X   |
| 2                 |                                             | <i>Capnella</i>                                   |                                                  | X   |     |     |     |     |          |          |     |
| 3                 |                                             | <i>Cladiella</i>                                  |                                                  |     |     | X   | X   | X   |          |          |     |
| 4                 |                                             | <i>Clavalaria</i>                                 |                                                  |     |     |     |     |     |          |          | X   |
| 5                 |                                             | <i>Lobophytun</i>                                 |                                                  |     | X   | X   | X   | X   |          |          |     |
| 6                 |                                             | <i>Sarcoophyton</i>                               |                                                  | X   | X   | X   | X   | X   |          |          |     |
| 7                 |                                             | <i>Subergorgia</i>                                |                                                  |     |     |     |     | X   |          |          |     |

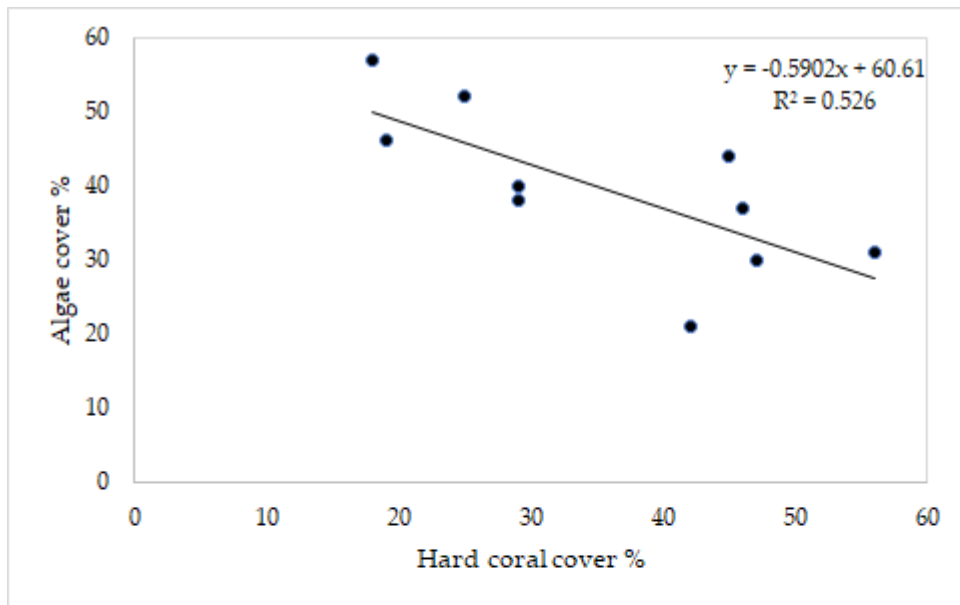

**Supplementary Figure 1.** Regression analysis of mean percentage live coral cover with mean percentage algal cover (turf algae, macroalgae, and crustose coralline algae) among the study sites.



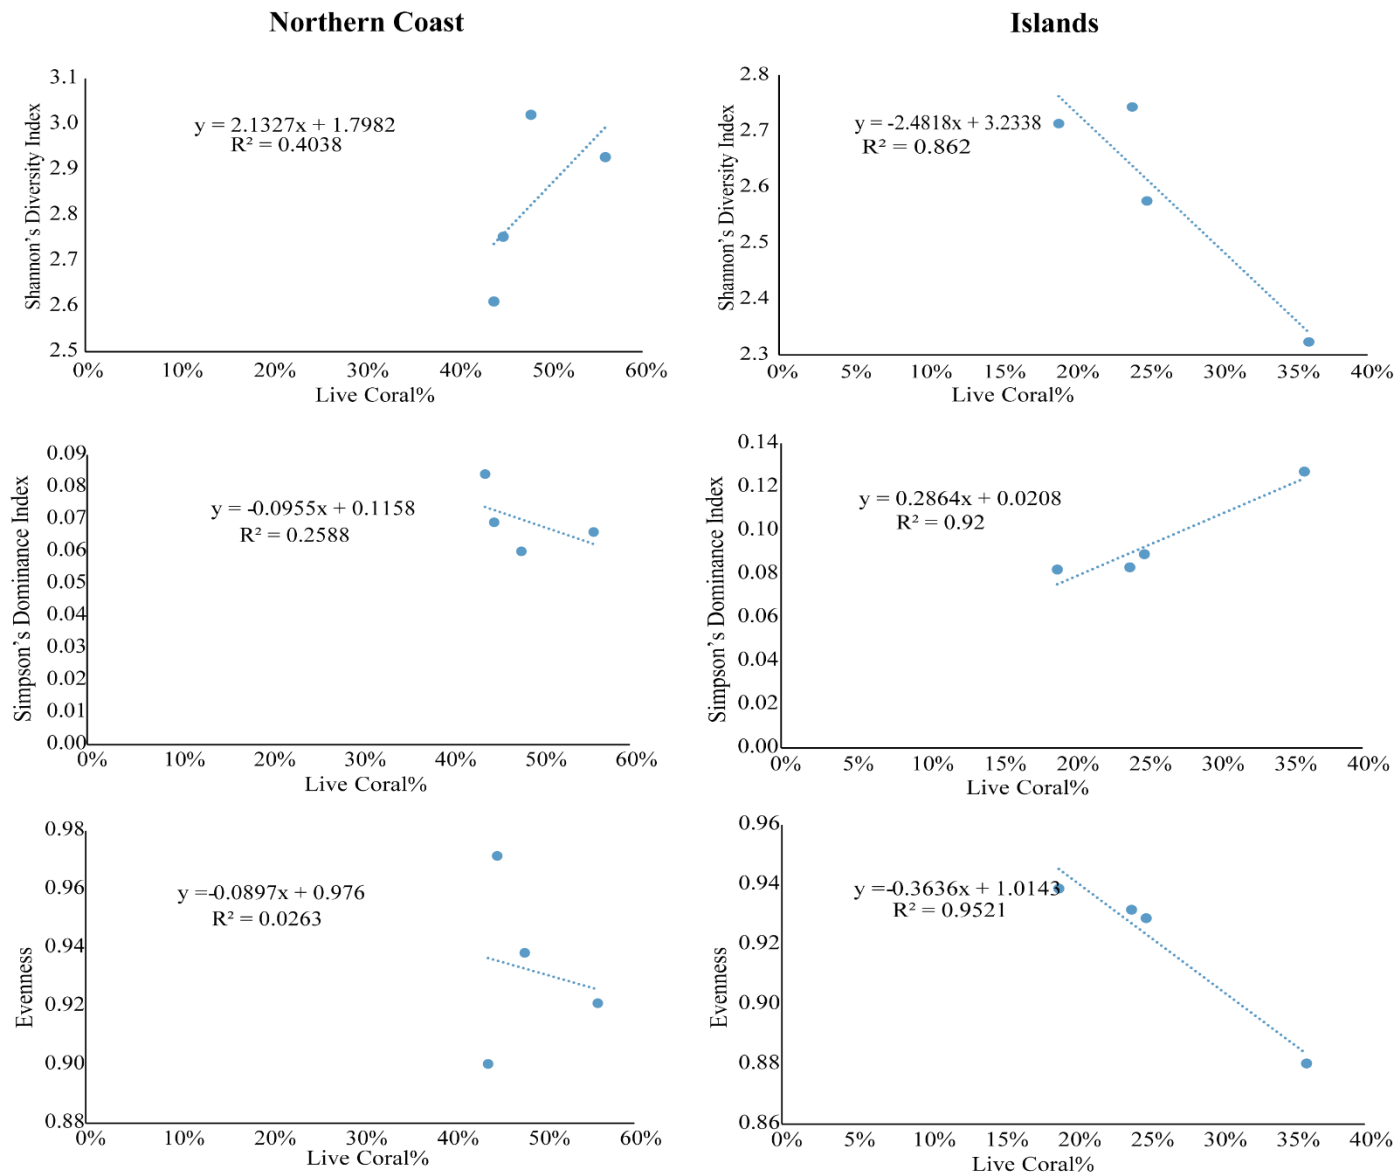

**Supplementary Figure 2.** Regression plots of mean percentage live coral cover against Shannon's diversity index, Simpson's dominance index, and Evenness index, shown separately for each of the two parts I study area, i.e. the northern coast area (left panel figures) and the Palk Bay islands (right panel figures).
